# Supplementary material for: The catalytic activity of TCPTP is auto-regulated by its intrinsically disordered tail and activated by Integrin alpha-1
Source: PubMed Central journal article supplement (PMC8748766; doi:10.1038/s41467-021-27633-6), 2022-01-10
Supplement: 41467_2021_27633_MOESM1_ESM.pdf [file 41467_2021_27633_MOESM1_ESM.pdf]

## Supplementary Information

### **The catalytic activity of TCPTP is auto-regulated by its intrinsically disordered tail and activated by Integrin alpha-1**

Jai Prakash Singh<sup>1,2,3,#</sup>, Yang Li<sup>4,#</sup>, Yi-Yun Chen<sup>1,5</sup>, Shang-Te Danny Hsu<sup>1,2,6</sup>, Rebecca Page<sup>7</sup>,  
Wolfgang Peti<sup>4,\*</sup> & Tzu-Ching Meng<sup>1,2,6,\*</sup>

<sup>1</sup>Institute of Biological Chemistry, Academia Sinica, 128 Academia Road Sec. 2, Nankang, Taipei 115, Taiwan; <sup>2</sup>Chemical Biology and Molecular Biophysics, Taiwan International Graduate Program, Academia Sinica, 128 Academia Road Sec. 2, Nankang, Taipei 115, Taiwan; <sup>3</sup>Department of Chemistry, National Tsing-Hua University, 101 Kuang-Fu Road Sec. 2, Hsinchu 300, Taiwan; <sup>4</sup>Department of Molecular Biology and Biophysics, University of Connecticut Health Center, Farmington, CT 06030, USA; <sup>5</sup>Academia Sinica Common Mass Spectrometry Facilities for Proteomics and Protein Modification Analysis, 128 Academia Road Sec. 2, Nankang, Taipei 115, Taiwan; <sup>6</sup>Institute of Biochemical Sciences, National Taiwan University, 1 Roosevelt Road Sec. 4, Taipei 106, Taiwan; <sup>7</sup>Department of Cell Biology, University of Connecticut Health Center, Farmington, CT 06030, USA.

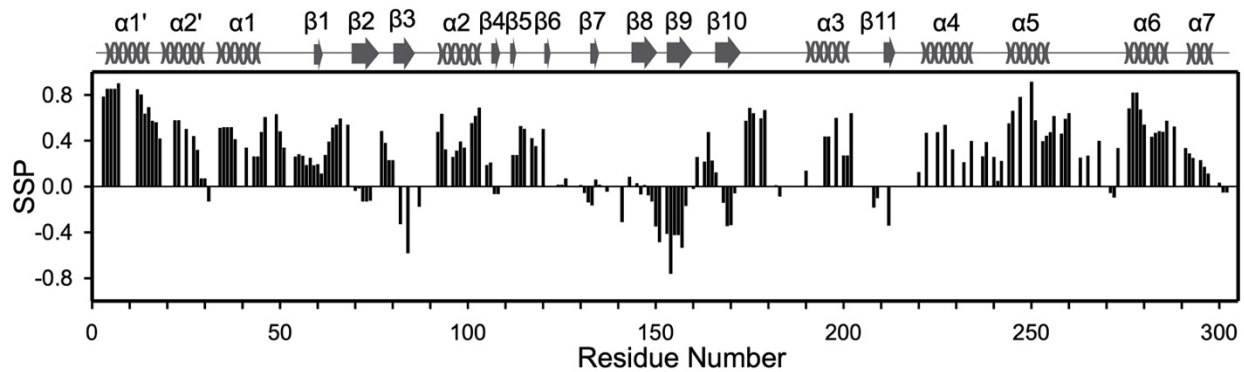

**Supplementary Figure 1: TCPTP<sub>CAT</sub> secondary structure.** Secondary-structure propensity (SSP) data plotted vs. TCPTP<sub>CAT</sub> residue numbers. (SSP > 0, α helix; SSP < 0, β strand). Above: secondary structure from the crystal structure of TCPTP<sub>CAT</sub> (PDB: 1L8K).

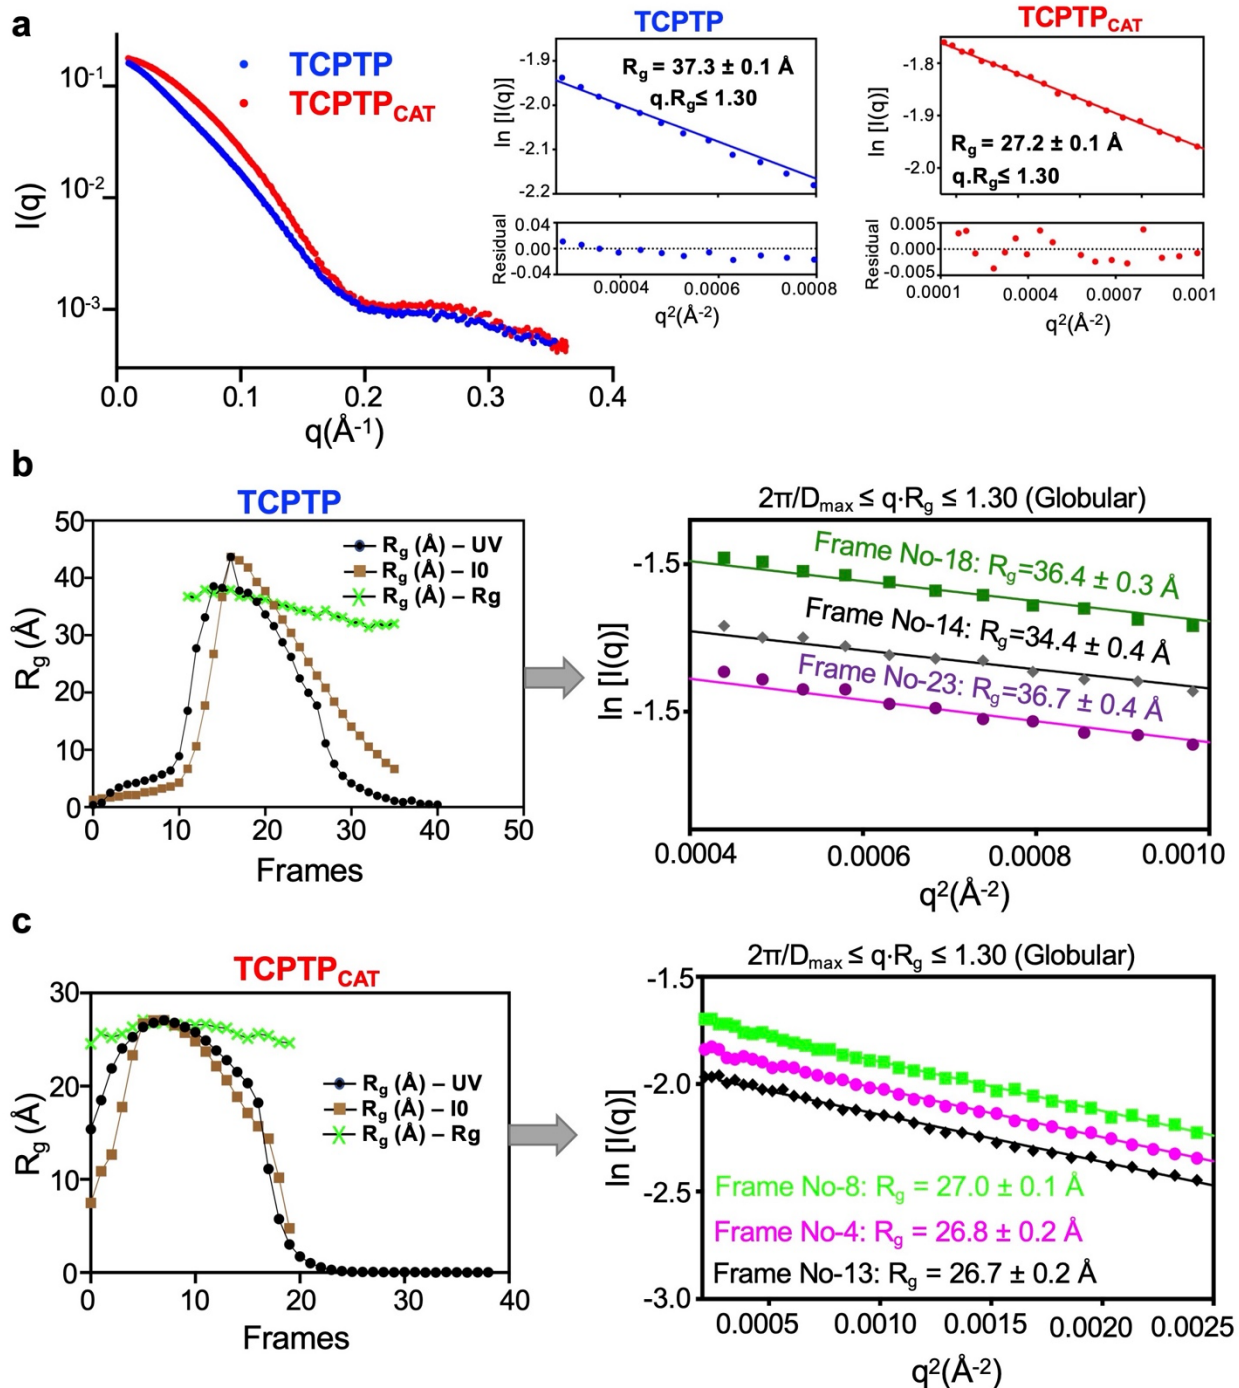

**Supplementary Figure 2: Characterization of TCPTP and TCPTP<sub>CAT</sub> by SAXS.** **a** Comparison of SAXS scattering data and their Guinier plot ( $q_{\max} \times R_g < 1.3$ ) for TCPTP (blue) and TCPTP<sub>CAT</sub> (residues 1-314, red). **b**  $R_g$  distribution of TCPTP across the total SAXS frames for which data were collected and Guinier plotted ( $q_{\max} \times R_g < 1.3$ ) from three individual frames to show consistent  $R_g$  value. **c**  $R_g$  distribution of TCPTP<sub>CAT</sub> across the total SAXS frames for which data were collected and Guinier plotted ( $q_{\max} \times R_g < 1.3$ ) from three individual frames to show consistent  $R_g$  value. Source data are provided as a Source Data file.

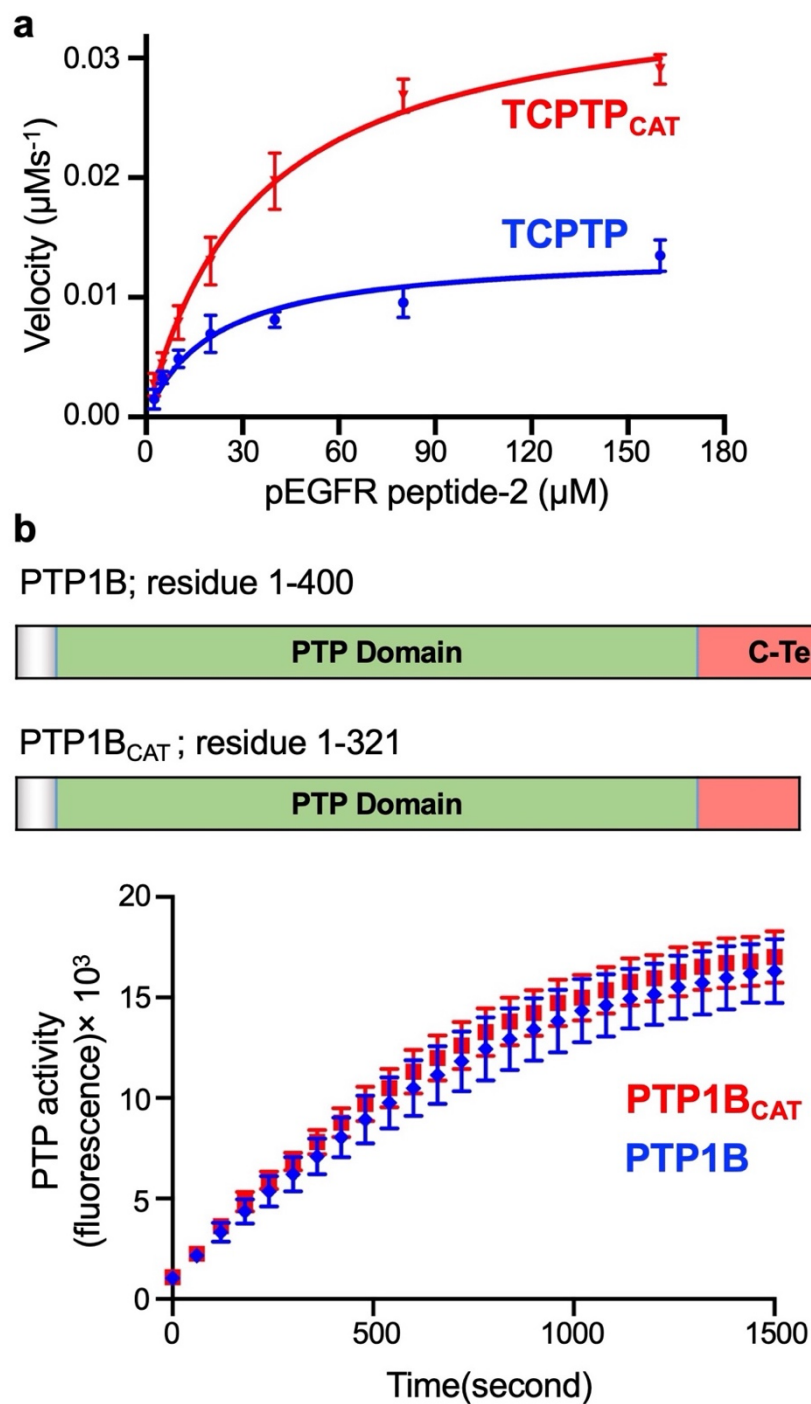

**Supplementary Figure 3: Comparison of the catalytic activity for TCPTP and PTP1B. a** Catalytic activity of TCPTP and TCPTP<sub>CAT</sub> (residues 1-314) against pEGFR peptide-2, derived from the EGFR's kinase domain activation loop. Data are presented as the mean of nine independent reactions ( $n = 9$ ; mean  $\pm$  SE). **b** Catalytic activity comparison of PTP1B and PTP1B<sub>CAT</sub> using DiFMUP. Schematic representation of PTP1B (PTP1B) and catalytic domain (PTP1B<sub>CAT</sub>) constructs used in the assay are shown. Data are presented as the mean of six independent reactions ( $n = 6$ ; mean  $\pm$  SE). Source data are provided as a Source Data file.

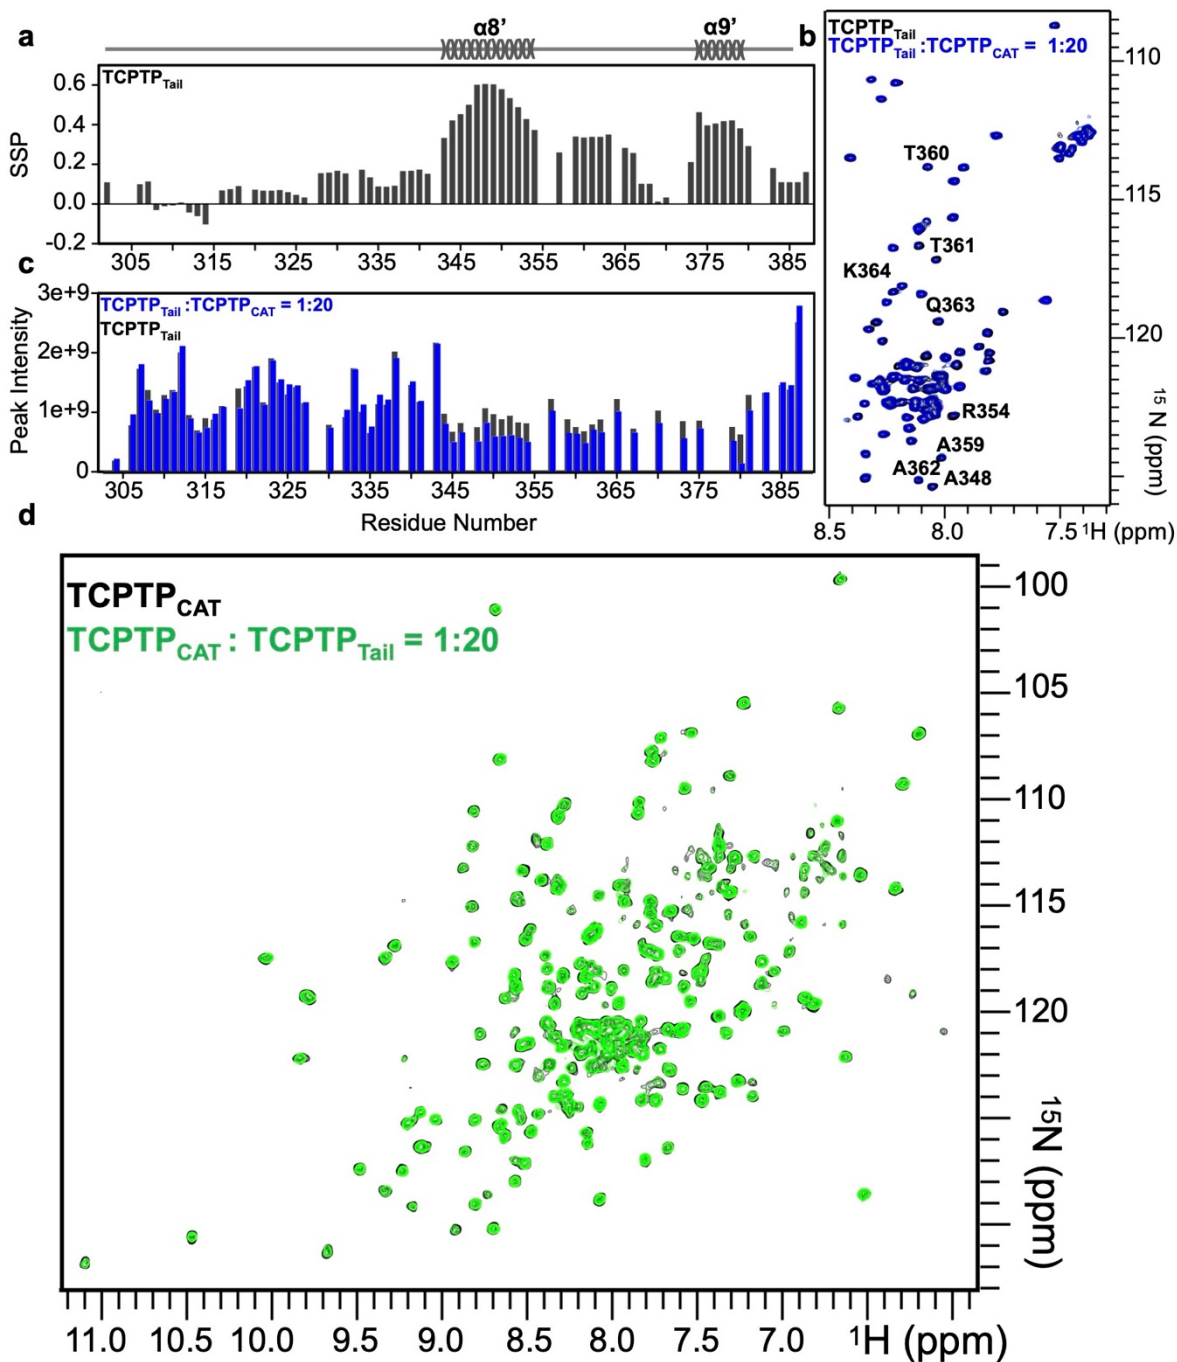

**Supplementary Figure 4: Intermolecular interaction between TCPTP<sub>CAT</sub> and TCPTP<sub>Tail</sub> by NMR spectroscopy.** **a** SSP vs TCPTP<sub>Tail</sub> residue numbers. Data indicate regions with transient secondary structures (SSP > 0,  $\alpha$  helix; SSP < 0,  $\beta$  strand). **b** Overlay of the 2D [<sup>1</sup>H, <sup>15</sup>N] HMQC spectra of <sup>15</sup>N-labeled TCPTP<sub>Tail</sub> (black) and TCPTP<sub>CAT</sub>-bound (1:20 ratio; navy). Residues that experience cross peaks intensity reduction upon addition of TCPTP<sub>CAT</sub> are annotated. **c** Cross peak intensity comparison between free TCPTP<sub>Tail</sub> (black) and TCPTP<sub>CAT</sub>-bound (navy). **d** Overlay of the 2D [<sup>1</sup>H, <sup>15</sup>N] TROSY spectra of (<sup>2</sup>H, <sup>15</sup>N)-labeled TCPTP<sub>CAT</sub> (black) and TCPTP<sub>Tail</sub>-bound (green).

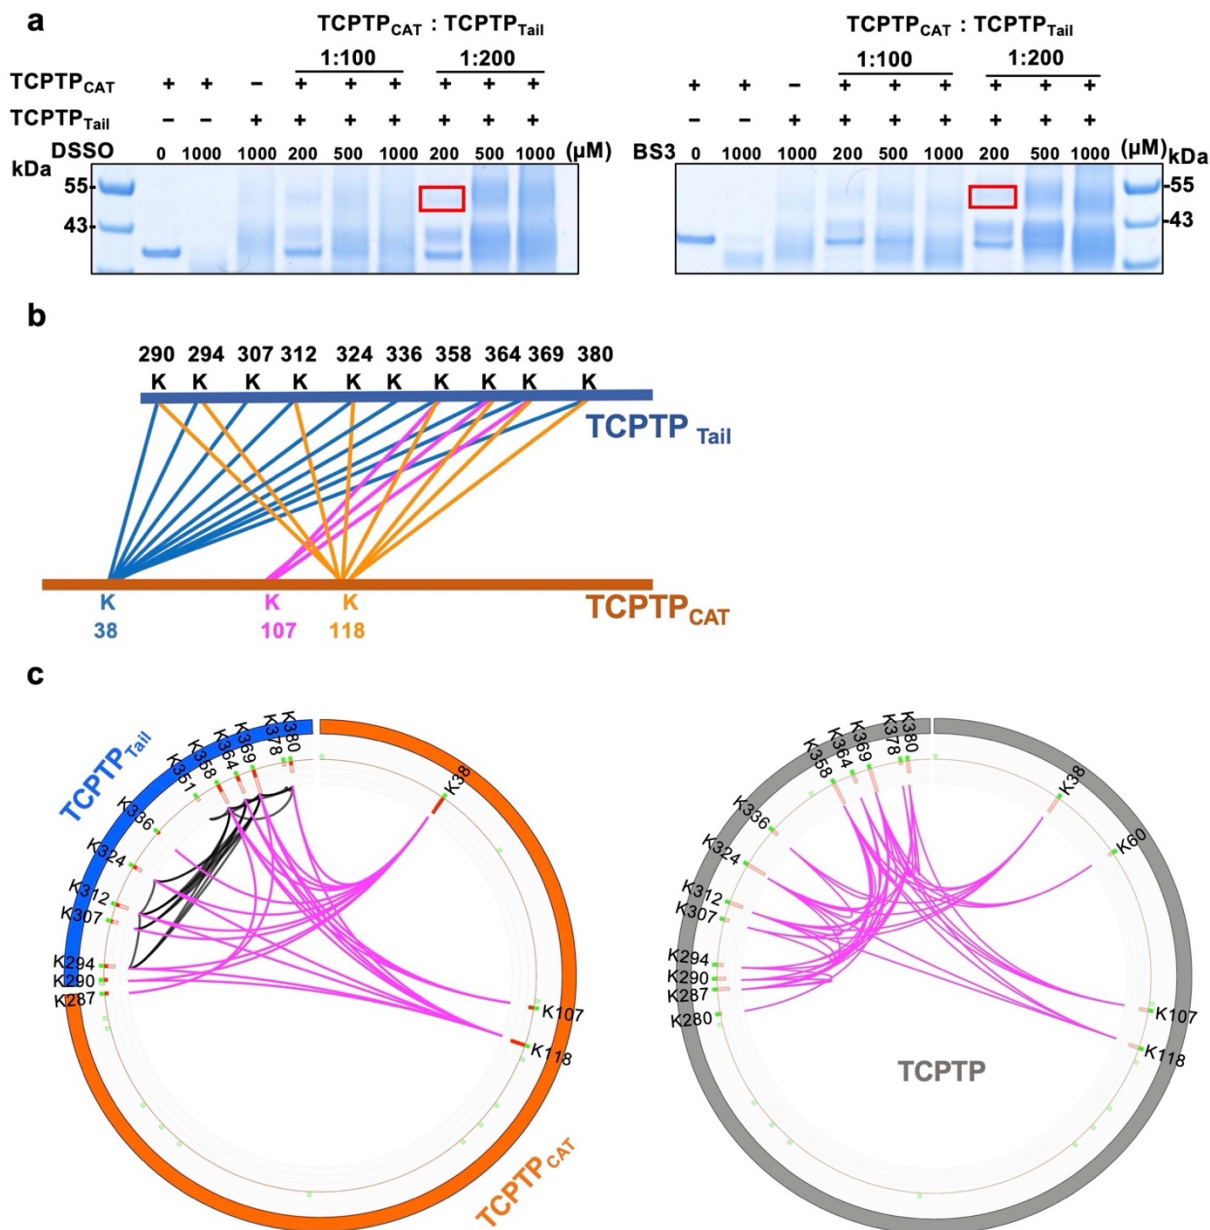

**Supplementary Figure 5: Intermolecular interaction between TCPTP<sub>CAT</sub> and TCPTP<sub>Tail</sub> detected by CX-MS. a** Intermolecular chemical cross-linking between TCPTP<sub>CAT</sub> (residues 1-288) and TCPTP<sub>Tail</sub> (residues 289-387) by DSSO (left; SDS-PAGE) and BS3 (right; SDS-PAGE). Each lane on SDS-PAGE is from independent reaction mixture at the indicated concentration of cross-linker, labeled on top in  $\mu\text{M}$  unit. The cross-linked product of complex (TCPTP<sub>CAT</sub> + TCPTP<sub>Tail</sub>) appeared at the position corresponding to molecular weight of TCPTP. Red box indicates excised cross-linked product of complex from SDS-PAGE for MS analysis. **b** Cross-linking map of inter molecular interaction showing lysine residues cross-linked between TCPTP<sub>CAT</sub> and TCPTP<sub>Tail</sub>. **c** Comprehensive view shows all lysine residues identified from inter- or intra-molecular crosslinking experiment by DSSO and BS3. Maps were generated by CX-Circos (left, Intermolecular CX-MS map; right, Intramolecular CX-MS map). Source data are provided as a Source Data file.

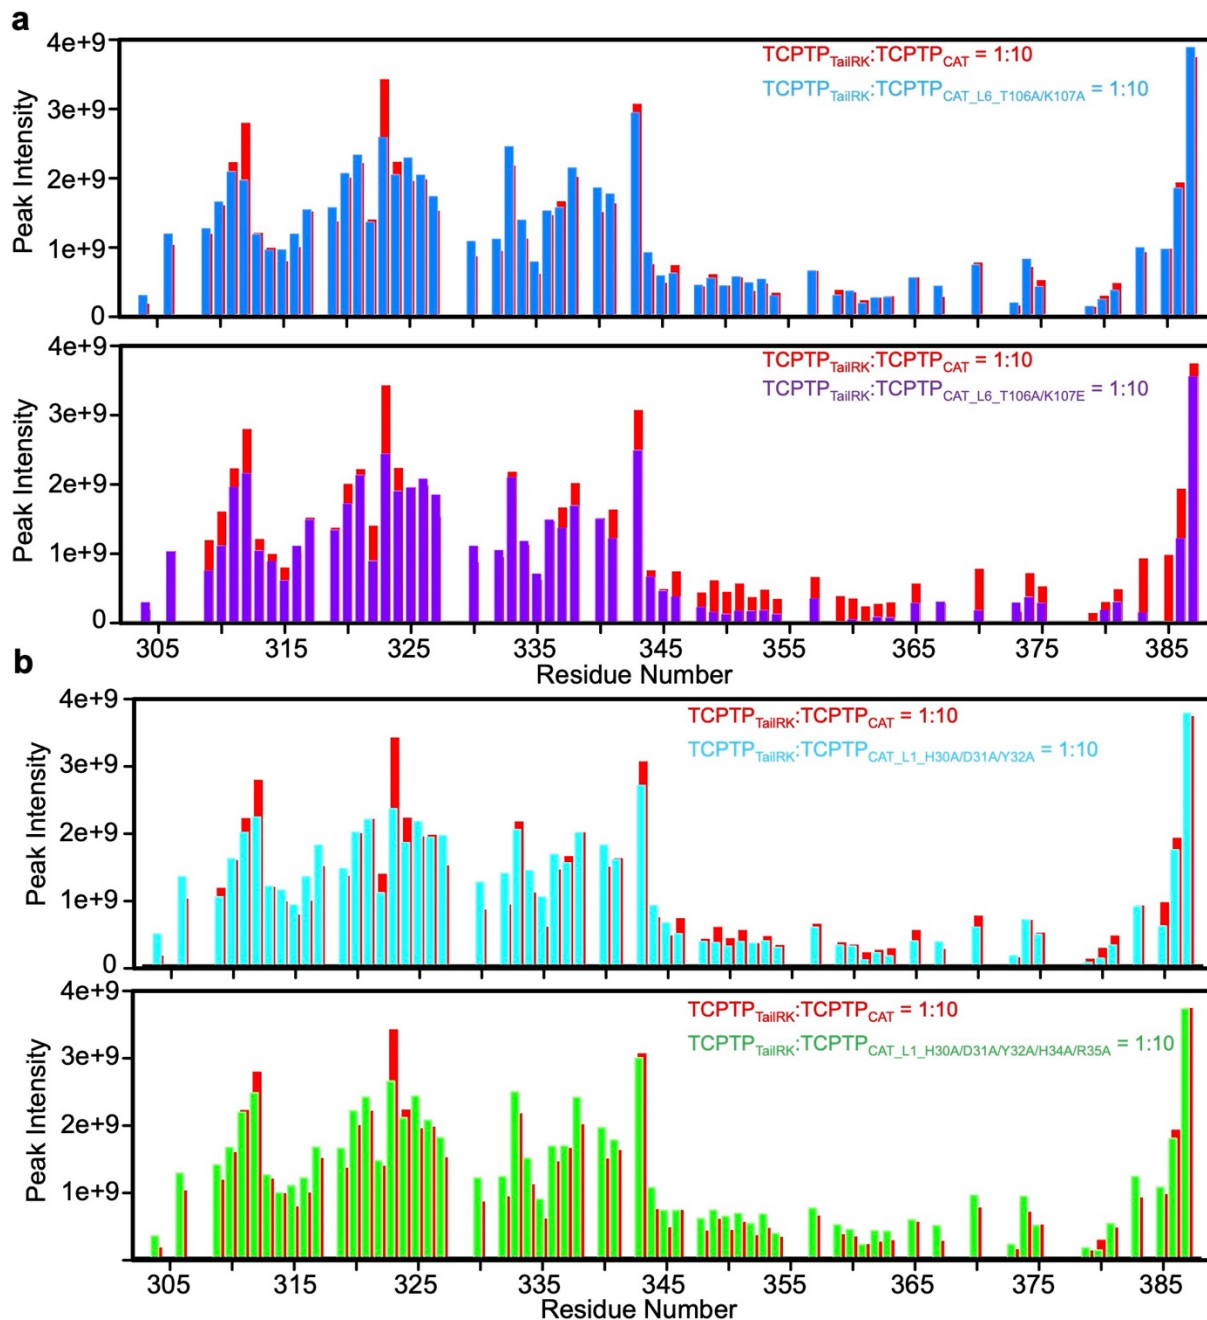

**Supplementary Figure 6: ‘Fuzzy’ charge:charge interactions are critical for the interaction of TCPTP<sub>CAT</sub> and TCPTP<sub>Tail</sub>.** **a** Peak intensity comparison between TCPTP<sub>CAT</sub>-bound TCPTP<sub>TailRK</sub> (red) and TCPTP<sub>CAT\_L6\_T106A/K107A</sub>-bound TCPTP<sub>TailRK</sub> (blue); no difference. Peak intensity comparison between TCPTP<sub>CAT</sub>-bound TCPTP<sub>TailRK</sub> (red) and TCPTP<sub>CAT\_L6\_T106A/K107E</sub>-bound TCPTP<sub>TailRK</sub> (purple); charge reversal of K107E leads to expected stronger binding, highlighting the importance of charge in L6. **b** Peak intensity comparison between TCPTP<sub>CAT</sub>-bound TCPTP<sub>TailRK</sub> (red) and TCPTP<sub>CAT\_L1\_H30A/D31A/Y32A</sub>-bound TCPTP<sub>TailRK</sub> (turquoise); minor differences. Peak intensity comparison between TCPTP<sub>CAT</sub>-bound TCPTP<sub>TailRK</sub> (red) and TCPTP<sub>CAT\_L1\_H30A/D31A/Y32A/H34A/R35A</sub>-bound TCPTP<sub>TailRK</sub> (green); deletion of charge H34A/R35A leads to an expected weakening of binding, highlighting the importance of charge in L1.

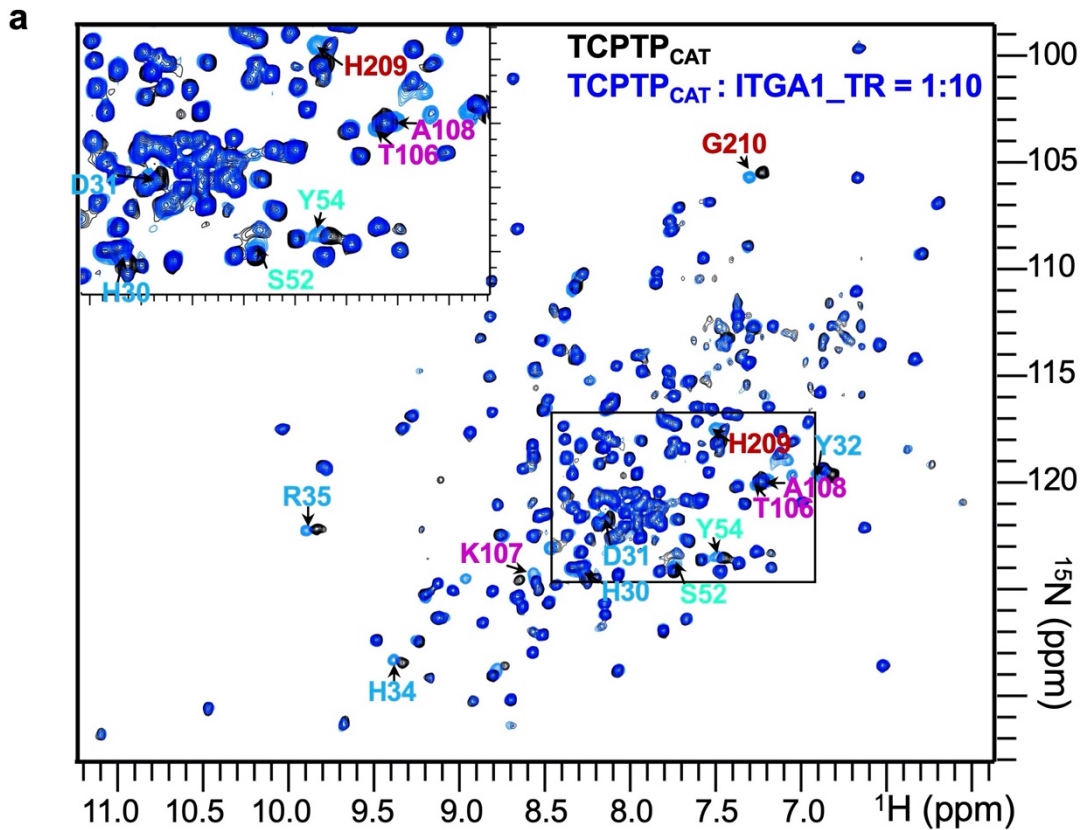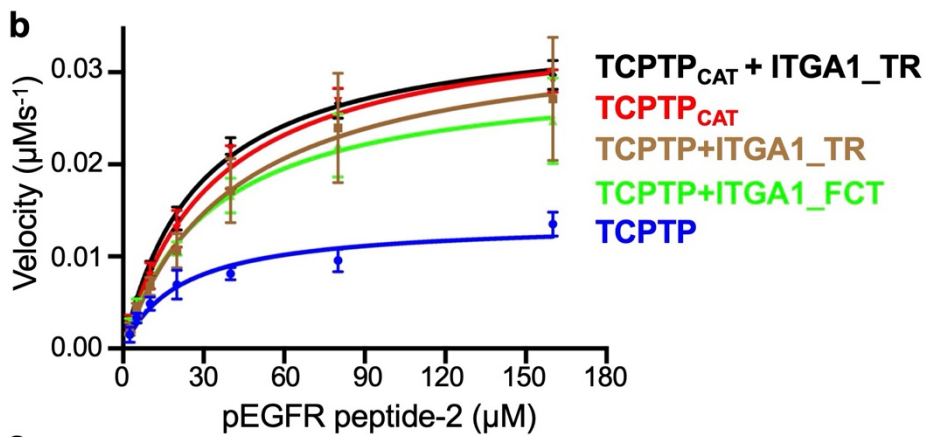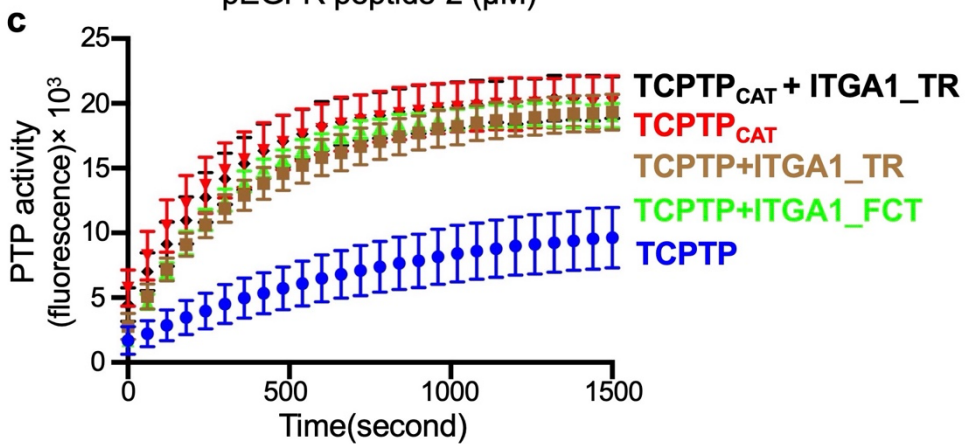



**Supplementary Figure 7: Molecular basis for ITGA1 mediated activation of TCPTP activity.**

**a** Overlay of the 2D [ $^1\text{H}$ ,  $^{15}\text{N}$ ] TROSY spectra of ( $^2\text{H}$ ,  $^{15}\text{N}$ )-labeled TCPTP<sub>CAT</sub> (black) and in complex with Integrin  $\alpha$ 1 peptide ITGA1\_TR (navy). Residues with CSPs upon ITGA1\_TR addition are annotated. Residues that changed upon IGTA1 interaction are located in the TCPTP loop L1 (green), L2 (navy), L6 (purple) and L14 (orange). **b** Catalytic activity of TCPTP and TCPTP<sub>CAT</sub> (residue: 1-314) in the presence or absence of synthetic ITGA1 (ITGA1\_FCT or ITGA1\_TR) peptides at saturation against pEGFR peptide-2, derived from the EGFR's kinase domain activation loop. **c** Catalytic activity of TCPTP and TCPTP<sub>CAT</sub> (residue: 1-314) in the presence or absence of synthetic ITGA1(ITGA1\_FCT or ITGA1\_TR) peptides at saturation against DiFMUP. Data shown in **(b)** and **(c)** are presented as the mean of nine independent reactions ( $n = 9$ ; mean  $\pm$  SE). Source data are provided as a Source Data file.

**a**

```

ITGA1  KIGFFKRPLKKKMEK-----
ITGA2  KLGFFKRKYEKMTKNPDEIDETTE--LSS-----
ITGA10 KLGFFFAHKKIPEEEKREE---KLE--Q-----
ITGA11 KLGFFRSARRRREPGLDPTPKVLE-----
ITGAE  KCGFFKRKYQQLNLESIRKAQLKS-EN---LLEEN-----
ITGAL  KVGFFKRNLKEMEAGRGVNGIPAEDSEQLASQEAGD-----PGCLKPLHEKDSSEGGGKD-----
ITGAM  KLGFFKRQYKDMSEGGPPGAEPEQ-----
ITGAD  KLGFFKRHYKEMLEDKPEDTATFSGDDF-----SCVAPNVPLS-----
ITGAX  KVGFFKRQYKEMEEANGQIAPENGTQT-----PS---PPSEK-----
ITGA3  KCGFFKRARTRAL----YEAKRQKAEMKSPSETERLTDD----Y-----
ITGA6  KCGFFKRSRY-DDSVPRYHAVRIRKEEREIKD--EKYIDNLEKKQWITKWNENESYS-----
ITGA7  KMGFFKRAKHP EATVPQYHAVKIPREDRQQFK--EKTGTILRNWGSPPREGPD AHPILAADGHP E LGPDGHPGPGTA
ITGA4  KAGFFKRQYKSILQE-----ENR-----RDSWS-----YINSKSNDD-----
ITGA9  KMGFFRRRYKEII EA-----EKNRKEN--EDSWD-----WVQKNQ-----
ITGA2B KVGFFKRNRPPLEED-----DEEGE-----
ITGAV  RMGFFKRVRPPQEEQ-----EREQ-LQ--PHENG-----EGNSETE-----
ITGA5  KLGFFKRSLPYGTAM-----EKAQ-LK--PPATS-----DA-----
ITGA8  KCGFFDRARPPQEDM-----TDREQLT--NDKTP-----EA-----

```

**b**

```

ITGA1 : KIGFFKRPLKKKMEK
ITGA10 : KLGFFFAHKKIPEEEKREEKLEQ
ITGA11 : KLGFFRSARRRREPGLDPTPKVLE

```

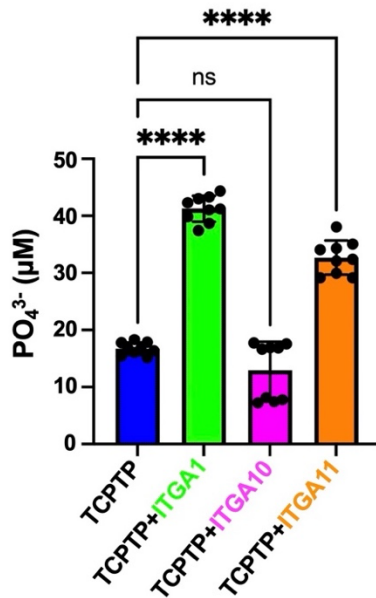

**Supplementary Figure 8: TCPTP is distinctively activated by Integrin cytoplasmic tail with positive charge residue clusters.** **a** Sequence alignment of the cytoplasmic tail for the human Integrin family. Positive charge residues are highlighted in blue, while negative charge residues are red; a black box highlights large clusters of positive charge residue. **b** Effect of ITGA1, ITGA10 & ITGA11 on the catalytic activity of TCPTP, measured against pEGFR peptide-2, derived from the EGFR's kinase domain activation loop. Data are presented as the mean of nine independent reactions ( $n = 9$ ; mean  $\pm$  SD). \*\*\*\* indicates  $p$ -value of  $<0.0001$ , obtained from one-way ANOVA analysis with Tukey's multiple comparison test, 'ns' indicates non-significant ( $p$ -value = 0.0743). Peptides derived from ITGA1, ITGA10 and ITGA11 used in the assays are shown. Source data are provided as a Source Data file.

**Supplementary Table 1: SAXS data collection and scattering derived parameter for TCPTP and TCPTP<sub>CAT</sub>.** Source data are provided as a Source Data file.

|                                                                                | TCPTP                                                 | TCPTP <sub>CAT</sub>                                  |
|--------------------------------------------------------------------------------|-------------------------------------------------------|-------------------------------------------------------|
| <b>Sample details</b>                                                          |                                                       |                                                       |
| Organism                                                                       | <i>Homo sapience</i>                                  | <i>Homo sapience</i>                                  |
| Source                                                                         | <i>E. coli</i> expressed                              | <i>E. coli</i> expressed                              |
| Sample Injection volume (μl)                                                   | 100                                                   | 100                                                   |
| Sample concentration (mg.ml <sup>-1</sup> )                                    | ~15                                                   | ~15                                                   |
| Flow rate (ml.min <sup>-1</sup> )                                              | 0.035                                                 | 0.035                                                 |
| <b>Data collection parameter</b>                                               |                                                       |                                                       |
| Beamline                                                                       | BL23A1, NSRRC Taiwan                                  | BL23A1, NSRRC Taiwan                                  |
| Detector                                                                       | Pilatus 1M-F                                          | Pilatus 1M-F                                          |
| Sample to detector distance (mm)                                               | 2524                                                  | 2561                                                  |
| Column for SEC-SAXS                                                            | GE Healthcare Superdex 200 Increase 5/150 GL          | Agilent Bio SEC-3, 300 Å, 4.6 X 300 mm                |
| Wavelength (Å)                                                                 | 0.8266                                                | 0.8266                                                |
| <i>q</i> range (Å <sup>-1</sup> )                                              | 0.0005 - 0.44                                         | 0.0005 - 0.43                                         |
| Absolute scaling method                                                        | Comparison with scattering from pure H <sub>2</sub> O | Comparison with scattering from pure H <sub>2</sub> O |
| Exposure time per frame (sec)                                                  | 20                                                    | 20                                                    |
| Temperature (K)                                                                | 288                                                   | 288                                                   |
| <b>Structural parameter</b>                                                    |                                                       |                                                       |
| <i>I</i> <sub>(0)</sub> (cm <sup>-1</sup> ) (from Guinier)                     | 0.16 ± 4.3 x 10 <sup>-4</sup>                         | 0.18 ± 2.1 x 10 <sup>-4</sup>                         |
| <i>Rg</i> (Å) (from Guinier)                                                   | 37.3 ± 0.1                                            | 27.2 ± 0.1                                            |
| <i>I</i> <sub>(0)</sub> (cm <sup>-1</sup> ) [from P <sub>(<i>r</i>)</sub> ]    | 0.15 ± 1.9 x 10 <sup>-3</sup>                         | 0.17 ± 1.6 x 10 <sup>-3</sup>                         |
| <i>Rg</i> (Å) [from P <sub>(<i>r</i>)</sub> ]                                  | 38.5 ± 0.9                                            | 26.6 ± 0.4                                            |
| <i>D</i> <sub>max</sub> (Å)                                                    | 165                                                   | 105                                                   |
| Porod Volume (Å <sup>3</sup> )                                                 | 98700                                                 | 69900                                                 |
| Volume of correlation ( <i>V</i> <sub><i>c</i></sub> )                         | 475                                                   | 364                                                   |
| Molecular mass <i>M<sub>r</sub></i> from ( <i>V</i> <sub><i>c</i></sub> ) (Da) | 49176                                                 | 39576                                                 |
| Calculated <i>M<sub>r</sub></i> from sequence (Da)                             | 45440                                                 | 36881                                                 |
| <b>Software employed</b>                                                       |                                                       |                                                       |
| Primary data reduction                                                         | NSRRC 23A SWAXS data reduction package                | NSRRC 23A SWAXS data reduction package                |
| Data processing                                                                | PRIMUS, GNOM, ScÅtter                                 | PRIMUS, GNOM, ScÅtter                                 |
| Homology modeling                                                              | Phyre2                                                | N. A.                                                 |
| Ensemble conformation modeling                                                 | MultiFoXS                                             | N. A.                                                 |
| Three-dimensional graphic representation                                       | PyMOL                                                 | N. A.                                                 |

**Supplementary Table 2: Enzymatic activity assay (Michaelis-Menten analysis);** substrate pEGFR peptide-2, derived from the EGFR's kinase domain activation loop. Calculated kinetic parameter are presented as the mean of nine independent reactions ( $n=9$ ; mean  $\pm$  SE). Source data are provided as a Source Data file.

|                                 | $k_{cat}$ ( $s^{-1}$ ) | $K_m$ ( $\mu M$ ) | $k_{cat}/K_m$ ( $\mu M^{-1}s^{-1}$ ) |
|---------------------------------|------------------------|-------------------|--------------------------------------|
| <b>TCPTP</b>                    |                        |                   |                                      |
| TCPTP <sub>CAT</sub>            | 36.3 $\pm$ 0.9         | 34.0 $\pm$ 2.2    | 1.1 $\pm$ 0.1                        |
| TCPTP                           | 13.8 $\pm$ 0.5         | 21.2 $\pm$ 2.6    | 0.6 $\pm$ 0.1                        |
| <b>ITGA1 (saturated)</b>        |                        |                   |                                      |
| TCPTP <sub>CAT</sub> + ITGA1_TR | 35.6 $\pm$ 0.6         | 28.3 $\pm$ 1.3    | 1.2 $\pm$ 0.1                        |
| TCPTP + ITGA1_FCT               | 30.2 $\pm$ 1.2         | 32.8 $\pm$ 3.7    | 0.9 $\pm$ 0.1                        |
| TCPTP + ITGA1_TR                | 34.7 $\pm$ 2.3         | 40.9 $\pm$ 6.8    | 0.8 $\pm$ 0.1                        |

**Supplementary Table 3: TCPTP cross-linking analysis (intramolecular):** cross-linked residues by DSSO or BS3 cross-linkers. Source data are provided as a Source Data file.

| Sample                                | Position A<br>Lysine Residue in<br>TCPTP | Position B<br>Lysine Residue in<br>TCPTP | Score<br>(XLinkX) |
|---------------------------------------|------------------------------------------|------------------------------------------|-------------------|
| <b><i>TCPTP-DSSO Cross-linker</i></b> |                                          |                                          |                   |
| TCPTP-DSSO-Band                       | 38                                       | 312                                      | 142.9             |
| TCPTP-DSSO-Band                       | 38                                       | 324                                      | 290.5             |
| TCPTP-DSSO-Band                       | 38                                       | 336                                      | 68.5              |
| TCPTP-DSSO-Band                       | 38                                       | 358                                      | 41.1              |
| TCPTP-DSSO-Band                       | 107                                      | 364                                      | 81.9              |
| TCPTP-DSSO-Band                       | 107                                      | 369                                      | 141.2             |
| TCPTP-DSSO-Band                       | 118                                      | 312                                      | 154.9             |
| TCPTP-DSSO-Band                       | 118                                      | 324                                      | 211.6             |
| TCPTP-DSSO-Band                       | 118                                      | 358                                      | 216.1             |
| TCPTP-DSSO-Band                       | 118                                      | 369                                      | 87.3              |
| TCPTP-DSSO-Band                       | 280                                      | 369                                      | 107.7             |
| TCPTP-DSSO-Band                       | 287                                      | 294                                      | 34.8              |
| TCPTP-DSSO-Band                       | 287                                      | 364                                      | 17.3              |
| TCPTP-DSSO-Band                       | 287                                      | 290                                      | 117.8             |
| TCPTP-DSSO-Band                       | 290                                      | 369                                      | 21.0              |
| TCPTP-DSSO-Band                       | 312                                      | 324                                      | 214.8             |
| TCPTP-DSSO-Band                       | 312                                      | 369                                      | 137.0             |
| TCPTP-DSSO-Band                       | 324                                      | 369                                      | 136.9             |
| TCPTP-DSSO-Band                       | 358                                      | 369                                      | 97.9              |
| <b><i>TCPTP-BS3 Cross-linker</i></b>  |                                          |                                          |                   |
| TCPTP-BS3-Band                        | 38                                       | 307                                      | 81.3              |
| TCPTP-BS3-Band                        | 38                                       | 312                                      | 77.9              |
| TCPTP-BS3-Band                        | 38                                       | 324                                      | 101.7             |
| TCPTP-BS3-Band                        | 38                                       | 336                                      | 72.0              |
| TCPTP-BS3-Band                        | 38                                       | 358                                      | 44.8              |
| TCPTP-BS3-Band                        | 38                                       | 364                                      | 50.9              |
| TCPTP-BS3-Band                        | 38                                       | 369                                      | 113.9             |
| TCPTP-BS3-Band                        | 60                                       | 358                                      | 67.7              |
| TCPTP-BS3-Band                        | 60                                       | 364                                      | 41.9              |
| TCPTP-BS3-Band                        | 60                                       | 369                                      | 44.1              |
| TCPTP-BS3-Band                        | 107                                      | 358                                      | 78.0              |
| TCPTP-BS3-Band                        | 107                                      | 364                                      | 51.7              |
| TCPTP-BS3-Band                        | 107                                      | 369                                      | 113.9             |
| TCPTP-BS3-Band                        | 107                                      | 380                                      | 42.8              |
| TCPTP-BS3-Band                        | 118                                      | 324                                      | 101.7             |
| TCPTP-BS3-Band                        | 118                                      | 358                                      | 93.6              |
| TCPTP-BS3-Band                        | 118                                      | 369                                      | 50.3              |
| TCPTP-BS3-Band                        | 287                                      | 290                                      | 49.5              |
| TCPTP-BS3-Band                        | 287                                      | 358                                      | 110.4             |
| TCPTP-BS3-Band                        | 287                                      | 369                                      | 56.1              |
| TCPTP-BS3-Band                        | 287                                      | 380                                      | 52.8              |
| TCPTP-BS3-Band                        | 290                                      | 307                                      | 41.9              |
| TCPTP-BS3-Band                        | 290                                      | 358                                      | 87.7              |
| TCPTP-BS3-Band                        | 290                                      | 380                                      | 41.0              |
| TCPTP-BS3-Band                        | 294                                      | 312                                      | 42.3              |
| TCPTP-BS3-Band                        | 294                                      | 358                                      | 67.7              |

|                |     |     |       |
|----------------|-----|-----|-------|
| TCPTP-BS3-Band | 294 | 380 | 42.6  |
| TCPTP-BS3-Band | 307 | 358 | 52.5  |
| TCPTP-BS3-Band | 312 | 358 | 85.0  |
| TCPTP-BS3-Band | 312 | 380 | 42.8  |
| TCPTP-BS3-Band | 324 | 312 | 101.5 |
| TCPTP-BS3-Band | 324 | 336 | 80.7  |
| TCPTP-BS3-Band | 324 | 358 | 104.6 |
| TCPTP-BS3-Band | 324 | 364 | 43.2  |
| TCPTP-BS3-Band | 324 | 369 | 70.4  |
| TCPTP-BS3-Band | 324 | 380 | 58.9  |
| TCPTP-BS3-Band | 336 | 358 | 67.3  |
| TCPTP-BS3-Band | 358 | 369 | 100.9 |
| TCPTP-BS3-Band | 369 | 380 | 55.3  |
| TCPTP-BS3-Band | 378 | 369 | 53.4  |
| TCPTP-BS3-Band | 378 | 380 | 55.3  |

**Supplementary Table 4: Intermolecular cross-linking analysis between TCPTP<sub>CAT</sub> and TCPTP<sub>Tail</sub>: cross-linked residue by either DSSO or BS3 cross-linker. Source data are provided as a Source Data file.**

| Sample                                                                    | Position A<br>Lysine Residue<br>in TCPTP | Position B<br>Lysine Residue<br>in TCPTP | Score<br>(XLinkX) |
|---------------------------------------------------------------------------|------------------------------------------|------------------------------------------|-------------------|
| <b><i>TCPTP<sub>CAT</sub> +TCPTP<sub>Tail</sub>-DSSO Cross-linker</i></b> |                                          |                                          |                   |
| TCPTP <sub>CAT</sub> +TCPTP <sub>Tail</sub> -DSSO Band                    | 38                                       | 312                                      | 163.3             |
| TCPTP <sub>CAT</sub> +TCPTP <sub>Tail</sub> -DSSO Band                    | 38                                       | 358                                      | 129.5             |
| TCPTP <sub>CAT</sub> +TCPTP <sub>Tail</sub> -DSSO Band                    | 38                                       | 380                                      | 125.5             |
| TCPTP <sub>CAT</sub> +TCPTP <sub>Tail</sub> -DSSO Band                    | 107                                      | 358                                      | 129.4             |
| TCPTP <sub>CAT</sub> +TCPTP <sub>Tail</sub> -DSSO Band                    | 107                                      | 364                                      | 239.6             |
| TCPTP <sub>CAT</sub> +TCPTP <sub>Tail</sub> -DSSO Band                    | 107                                      | 369                                      | 194.2             |
| TCPTP <sub>CAT</sub> +TCPTP <sub>Tail</sub> -DSSO Band                    | 118                                      | 290                                      | 175.1             |
| TCPTP <sub>CAT</sub> +TCPTP <sub>Tail</sub> -DSSO Band                    | 118                                      | 294                                      | 201.2             |
| TCPTP <sub>CAT</sub> +TCPTP <sub>Tail</sub> -DSSO Band                    | 118                                      | 312                                      | 243.3             |
| TCPTP <sub>CAT</sub> +TCPTP <sub>Tail</sub> -DSSO Band                    | 118                                      | 324                                      | 259.7             |
| TCPTP <sub>CAT</sub> +TCPTP <sub>Tail</sub> -DSSO Band                    | 118                                      | 358                                      | 194.0             |
| TCPTP <sub>CAT</sub> +TCPTP <sub>Tail</sub> -DSSO Band                    | 118                                      | 364                                      | 305.1             |
| TCPTP <sub>CAT</sub> +TCPTP <sub>Tail</sub> -DSSO Band                    | 118                                      | 369                                      | 154.7             |
| TCPTP <sub>CAT</sub> +TCPTP <sub>Tail</sub> -DSSO Band                    | 118                                      | 380                                      | 164.7             |
| TCPTP <sub>CAT</sub> +TCPTP <sub>Tail</sub> -DSSO Band                    | 287                                      | 358                                      | 139.6             |
| TCPTP <sub>CAT</sub> +TCPTP <sub>Tail</sub> -DSSO Band                    | 287                                      | 369                                      | 122.5             |
| TCPTP <sub>CAT</sub> +TCPTP <sub>Tail</sub> -DSSO Band                    | 312                                      | 369                                      | 154.9             |
| TCPTP <sub>CAT</sub> +TCPTP <sub>Tail</sub> -DSSO Band                    | 324                                      | 364                                      | 150.2             |
| TCPTP <sub>CAT</sub> +TCPTP <sub>Tail</sub> -DSSO Band                    | 358                                      | 369                                      | 183.9             |
| TCPTP <sub>CAT</sub> +TCPTP <sub>Tail</sub> -DSSO Band                    | 358                                      | 380                                      | 227.4             |
| TCPTP <sub>CAT</sub> +TCPTP <sub>Tail</sub> -DSSO Band                    | 364                                      | 369                                      | 171.8             |
| TCPTP <sub>CAT</sub> +TCPTP <sub>Tail</sub> -DSSO Band                    | 364                                      | 380                                      | 245.5             |
| TCPTP <sub>CAT</sub> +TCPTP <sub>Tail</sub> -DSSO Band                    | 369                                      | 380                                      | 142.0             |
| <b><i>TCPTP<sub>CAT</sub> +TCPTP<sub>Tail</sub>-BS3 Cross-linker</i></b>  |                                          |                                          |                   |
| TCPTP <sub>CAT</sub> +TCPTP <sub>Tail</sub> -BS3 Band                     | 38                                       | 290                                      | 84.6              |
| TCPTP <sub>CAT</sub> +TCPTP <sub>Tail</sub> -BS3 Band                     | 38                                       | 294                                      | 81.6              |
| TCPTP <sub>CAT</sub> +TCPTP <sub>Tail</sub> -BS3 Band                     | 38                                       | 307                                      | 119.2             |
| TCPTP <sub>CAT</sub> +TCPTP <sub>Tail</sub> -BS3 Band                     | 38                                       | 312                                      | 101.7             |
| TCPTP <sub>CAT</sub> +TCPTP <sub>Tail</sub> -BS3 Band                     | 38                                       | 324                                      | 118.1             |
| TCPTP <sub>CAT</sub> +TCPTP <sub>Tail</sub> -BS3 Band                     | 38                                       | 336                                      | 77.9              |
| TCPTP <sub>CAT</sub> +TCPTP <sub>Tail</sub> -BS3 Band                     | 38                                       | 358                                      | 93.0              |
| TCPTP <sub>CAT</sub> +TCPTP <sub>Tail</sub> -BS3 Band                     | 38                                       | 364                                      | 71.7              |
| TCPTP <sub>CAT</sub> +TCPTP <sub>Tail</sub> -BS3 Band                     | 38                                       | 369                                      | 124.3             |
| TCPTP <sub>CAT</sub> +TCPTP <sub>Tail</sub> -BS3 Band                     | 38                                       | 380                                      | 52.8              |
| TCPTP <sub>CAT</sub> +TCPTP <sub>Tail</sub> -BS3 Band                     | 107                                      | 358                                      | 44.8              |
| TCPTP <sub>CAT</sub> +TCPTP <sub>Tail</sub> -BS3 Band                     | 107                                      | 369                                      | 72.0              |
| TCPTP <sub>CAT</sub> +TCPTP <sub>Tail</sub> -BS3 Band                     | 118                                      | 294                                      | 49.3              |
| TCPTP <sub>CAT</sub> +TCPTP <sub>Tail</sub> -BS3 Band                     | 118                                      | 358                                      | 78.0              |
| TCPTP <sub>CAT</sub> +TCPTP <sub>Tail</sub> -BS3 Band                     | 294                                      | 312                                      | 72.2              |
| TCPTP <sub>CAT</sub> +TCPTP <sub>Tail</sub> -BS3 Band                     | 294                                      | 358                                      | 72.0              |
| TCPTP <sub>CAT</sub> +TCPTP <sub>Tail</sub> -BS3 Band                     | 294                                      | 364                                      | 67.7              |
| TCPTP <sub>CAT</sub> +TCPTP <sub>Tail</sub> -BS3 Band                     | 294                                      | 369                                      | 72.3              |
| TCPTP <sub>CAT</sub> +TCPTP <sub>Tail</sub> -BS3 Band                     | 307                                      | 358                                      | 93.6              |
| TCPTP <sub>CAT</sub> +TCPTP <sub>Tail</sub> -BS3 Band                     | 307                                      | 364                                      | 56.2              |
| TCPTP <sub>CAT</sub> +TCPTP <sub>Tail</sub> -BS3 Band                     | 307                                      | 369                                      | 78.0              |

|                                                       |     |     |       |
|-------------------------------------------------------|-----|-----|-------|
| TCPTP <sub>CAT</sub> +TCPTP <sub>Tail</sub> -BS3_Band | 312 | 324 | 40.4  |
| TCPTP <sub>CAT</sub> +TCPTP <sub>Tail</sub> -BS3_Band | 312 | 358 | 107.5 |
| TCPTP <sub>CAT</sub> +TCPTP <sub>Tail</sub> -BS3_Band | 312 | 364 | 58.6  |
| TCPTP <sub>CAT</sub> +TCPTP <sub>Tail</sub> -BS3_Band | 312 | 369 | 83.7  |
| TCPTP <sub>CAT</sub> +TCPTP <sub>Tail</sub> -BS3_Band | 324 | 369 | 72.0  |
| TCPTP <sub>CAT</sub> +TCPTP <sub>Tail</sub> -BS3_Band | 351 | 358 | 84.1  |
| TCPTP <sub>CAT</sub> +TCPTP <sub>Tail</sub> -BS3_Band | 351 | 369 | 64.4  |
| TCPTP <sub>CAT</sub> +TCPTP <sub>Tail</sub> -BS3_Band | 358 | 364 | 125.4 |
| TCPTP <sub>CAT</sub> +TCPTP <sub>Tail</sub> -BS3_Band | 358 | 369 | 106.6 |
| TCPTP <sub>CAT</sub> +TCPTP <sub>Tail</sub> -BS3_Band | 364 | 369 | 101.6 |
| TCPTP <sub>CAT</sub> +TCPTP <sub>Tail</sub> -BS3_Band | 369 | 378 | 47.8  |
| TCPTP <sub>CAT</sub> +TCPTP <sub>Tail</sub> -BS3_Band | 369 | 380 | 41.0  |
| TCPTP <sub>CAT</sub> +TCPTP <sub>Tail</sub> -BS3_Band | 378 | 380 | 77.1  |



**Supplementary Table 5: Primers and recombinant DNA**

| <b>TCPTP construct variants</b>            | <b>Primer sequence (5' → 3')</b> |                                                                      | <b>SOURCE</b> |
|--------------------------------------------|----------------------------------|----------------------------------------------------------------------|---------------|
| <b>Mutation Primer</b>                     |                                  |                                                                      |               |
| TCPTP <sub>TailRK</sub>                    | Forward-1                        | 5'-GCAGATGAAACAGAGGCTAAATGAGAGGAAACGAAAAAGAAAAGGCCAAGATTGACA-3'      | This paper    |
|                                            | Reverse-1                        | 5'-TGTC AATCTTGGCCTTTTTCTTTTTCGTTTCCTCTCATTAGCCTCTGTTTCATCTGC-3'     | This paper    |
|                                            | Forward-2                        | 5'-GCAGATGAAACAGAGGCTAAGGAAAAGGAAACGAAAAAGAAAAGGCCAAGATTGACA-3'      | This paper    |
|                                            | Reverse-2                        | 5'-TGTC AATCTTGGCCTTTTTCTTTTTCGTTTCCTTTTCCTTAGCCTCTGTTTCATCTGC-3'    | This paper    |
| TCPTP_C-terminal mutant                    | Forward                          | 5' (P)-GGCGCGCCAAGATTGACAGACACC-3'                                   | This paper    |
|                                            | Reverse                          | 5' (P)-GCCGCGCTTCATTCTCATTAGCCTC -3'                                 | This paper    |
| TCPTP_L1 loop mutant                       | Forward                          | 5' (P)-CCGGCGGCGGTGGCCAAGTTTCCAGAA - 3'                              | This paper    |
|                                            | Reverse                          | 5' (P)-CGCCGCCGCGGACTCATTTCGAATTTCC -3'                              | This paper    |
| TCPTP_L1_loop_H30A/D31D/Y32A mutant        | Forward                          | 5'-TGTA CTTG GAAATTCGAAATGAGTCCGCTGCCGCTCCTCATAGAGTGGCCAAGTTTCCAG-3' | This paper    |
|                                            | Reverse                          | 5'-CTGGAAACTTGGCCACTCTATGAGGAGCGGCAGCGGACTCATTTCGAATTTCCAAGTACA-3'   | This paper    |
| TCPTP_L6 loop_T106A/K107 A mutant          | Forward                          | 5'-TTATGGTTTGGCAGCAGAAGGCCGCAGCAGTTGTCATGCTGAACC-3'                  | This paper    |
|                                            | Reverse                          | 5'-GGTTCAGCATGACA ACTGCTGCGGCCTTCTGCTGCCAAACCATAA-3'                 | This paper    |
| TCPTP_L6 loop_T106A/K107 E mutant          | Forward                          | 5'-TATGGTTTGGCAGCAGAAGGCCGAGGCAGTTGT CATGCTGAACC-3'                  | This paper    |
|                                            | Reverse                          | 5'-GGTTCAGCATGACA ACTGCCTCGGCCTTCTGCTGCCAAACCATAA-3'                 | This paper    |
| <b>Cloning Primer</b>                      |                                  |                                                                      |               |
| TCPTP (1-387)-pMCSG7 Vector                | Forward                          | 5'-TACTTCCAATCCAATGCGATGCCACCACCATCGAG -3'                           | This paper    |
|                                            | Reverse                          | 5'-TTATCCACTTCCAATGTTATTAGGTGTCTGTCAATCTTGG -3'                      | This paper    |
| TCPTP <sub>CAT</sub> (1-314)-pMCSG7 Vector | Reverse                          | 5'-TTATCCACTTCCAATGTTATTAATTGTATTTTTTCAGTCATT -3'                    | This paper    |

|                                               |         |                                                                  |            |
|-----------------------------------------------|---------|------------------------------------------------------------------|------------|
| TCPTP <sub>CAT</sub> (1-288)-pMCSG7 Vector    | Reverse | 5'-<br>TTATCCACTTCCAATGTTATTATCGTTTCTGTATA<br>CTAGAATC -3'       | This paper |
| TCPTP <sub>Tail</sub> (289-387)-pMCSG7 Vector | Forward | 5'-<br>TACTTCCAATCCAATGCGTGGAAGAAGAACTTTCTA<br>AGGAAG -3'        | This paper |
| TCPTP (1-387)-pRP1B Vector                    | Forward | 5'- GAATTTCCGATCCATGCCACCACCATC -3'                              | This paper |
|                                               | Reverse | 5'- GAAATTCCTCGAGTTAGGTGTCTGTCAATC -3'                           | This paper |
| TCPTP <sub>CAT</sub> (1-302)-pRP1B Vector     | Forward | 5'-<br>GGAAGACTTATCTCCTGCCTTTGATTAGTCACCA<br>AACAAAATAATGACT -3' | This paper |
|                                               | Reverse | 5'-<br>AGTCATTATTTTGTGGTGACTAATCAAAGGCA<br>GGAGATAAGTCTTCC -3'   | This paper |
| TCPTP <sub>Tail</sub> (303-387)-pRP1B Vector  | Forward | 5'-<br>ATTCGCGGATCCCATTACCAAACAAAATAATG<br>ACT -3'               | This paper |
|                                               | Reverse | 5'- GTGGTGCTCGAGTTAGGTGTCTGTCAATC -3'                            | This paper |

**Note:** 5'(P)- indicate phosphorylated primer at 5' end.
